# Supplementary material
Source: MDPI journal article supplement (https://www.mdpi.com/2079-6412/9/12/829)
Supplement: s1 [file s1]

# Supplementary Materials: Prospects of Low-Pressure Cold Spray for Superhydrophobic Coatings

Anna Gibas <sup>1,\*</sup>, Agnieszka Baszczuk <sup>1</sup>, Marek Jasiorski <sup>1</sup> and Marcin Winnicki <sup>2</sup>

<sup>1</sup> Department of Mechanics, Materials Science and Engineering, Wrocław University of Science and Technology, 25 Smoluchowskiego St., PL-50370 Wrocław, Poland; agnieszka.baszczuk@pwr.edu.pl (A.B.); marek.jasiorski@pwr.edu.pl (M.J.)

<sup>2</sup> Department of Materials Science, Strength and Welding Technology, Wrocław University of Science and Technology, 5 Łukasiewicza St., PL-50371 Wrocław, Poland; marcin.winnicki@pwr.edu.pl

\* Correspondence: gibas@kobalt.immt.pwr.wroc.pl or ammgibas@gmail.com

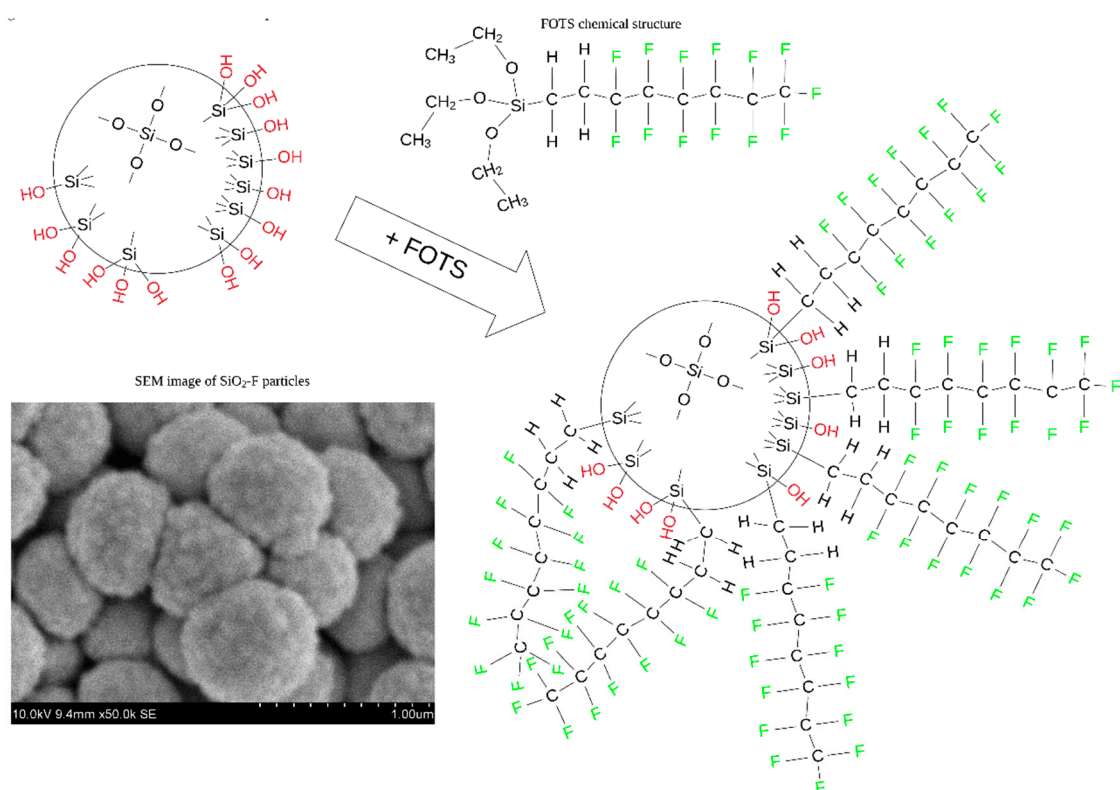

Figure S1. Scheme of functionalization process.

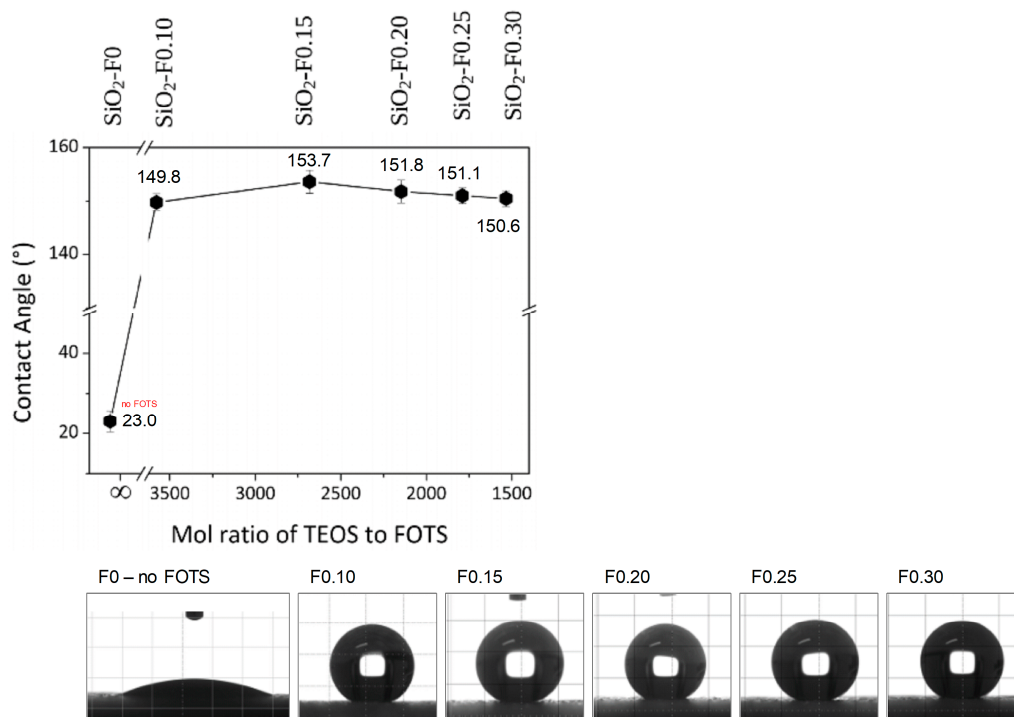

**Figure S2.** Wettability of coating SiO<sub>2</sub>-F<sub>x</sub> as a measure of contact angle (where *x* denotes the added amount of FOTS).

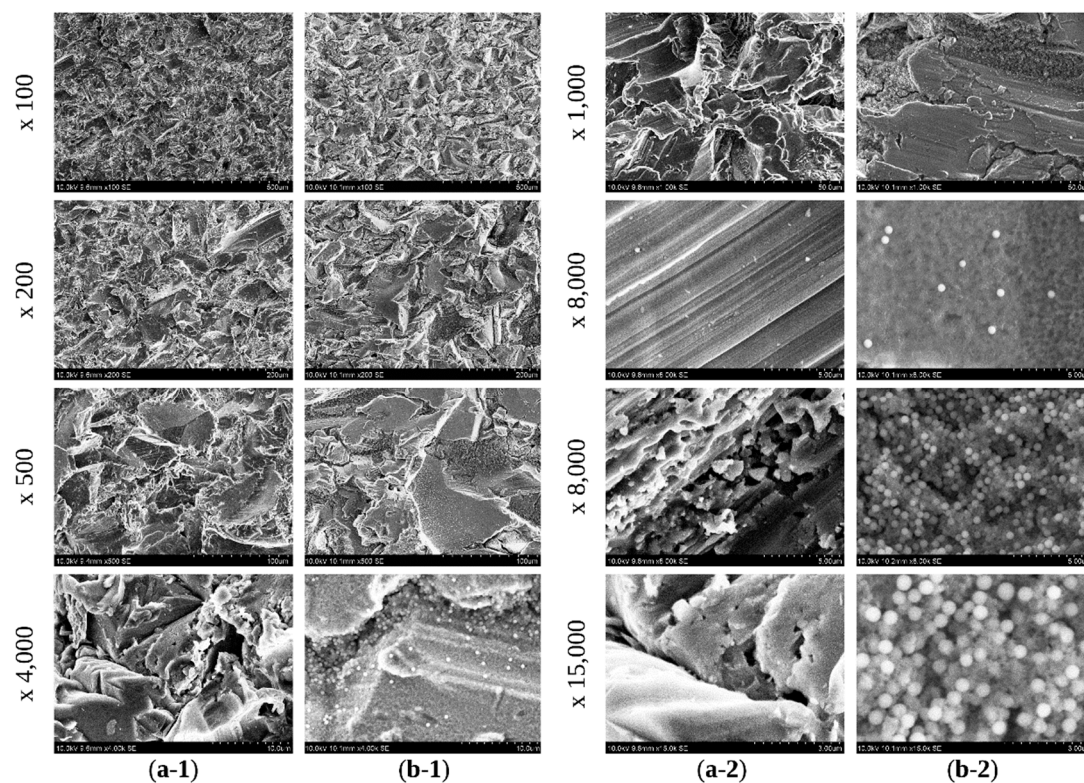

**Figure S3.** SEM images of substrate material (a-1,a-2) after sand-blasting and (b-1,b-2) after cold-spraying with SiO<sub>2</sub>-F powder on the previously sandblasted substrate.



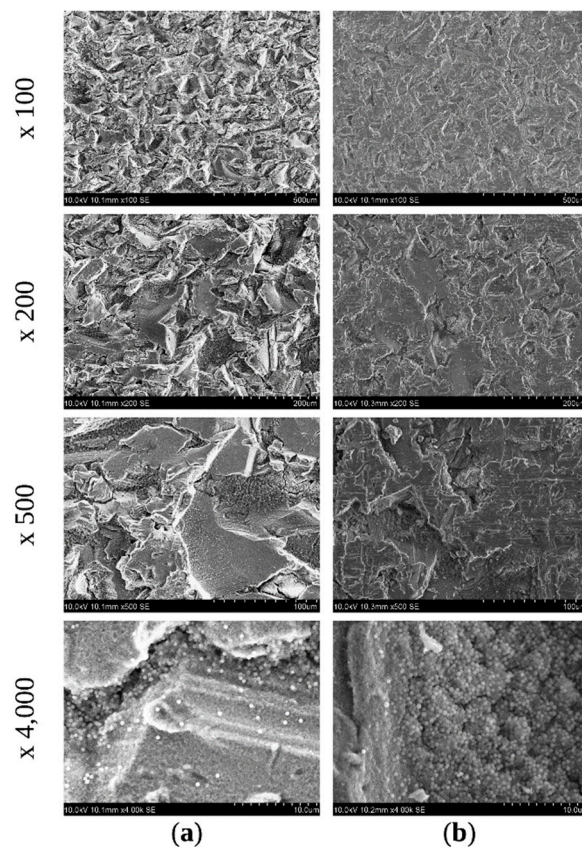

**Figure S4.** SEM images of coatings (a) in the as-prepared form and (b) after abrasive wear test on the distance 5.55 m.

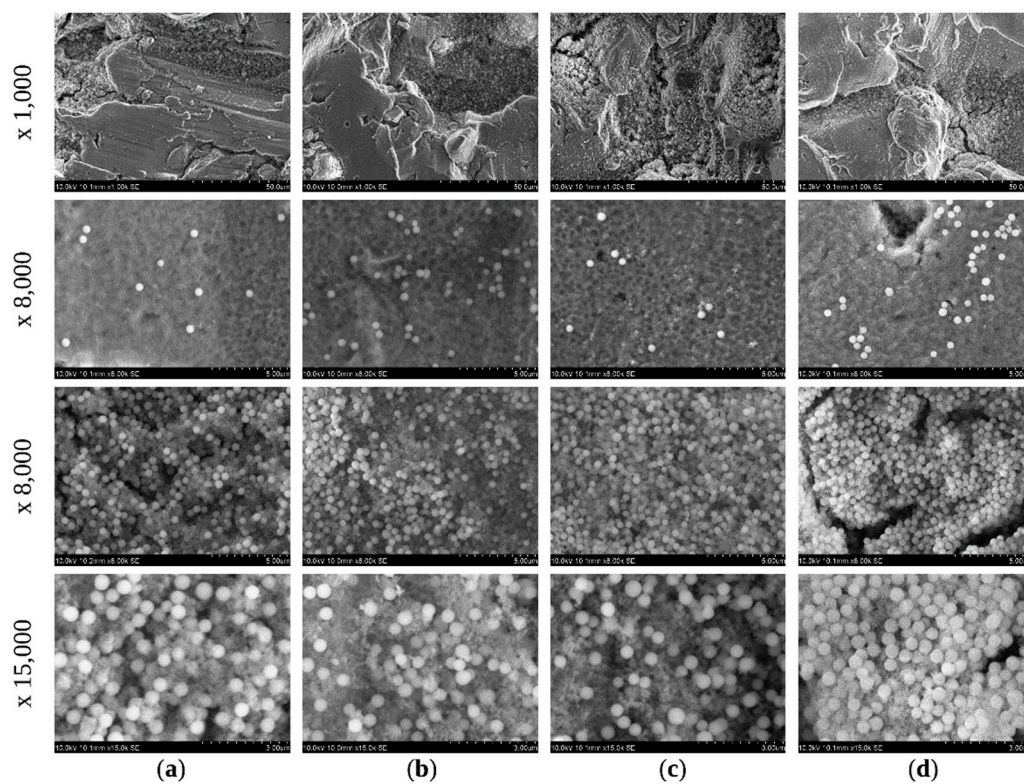

**Figure S5.** SEM images of 2 h-annealed coating at different temperatures: (a) as-prepared with no heat-treatment and heat-treated at (b) 350 °C, (c) 400 °C, (d) 500 °C.

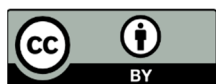

© 2019 by the authors. Submitted for possible open access publication under the terms and conditions of the Creative Commons Attribution (CC BY) license (<http://creativecommons.org/licenses/by/4.0/>).
